# Supplementary material
Source: PubMed Central journal article supplement (PMC1622880)

Wild type

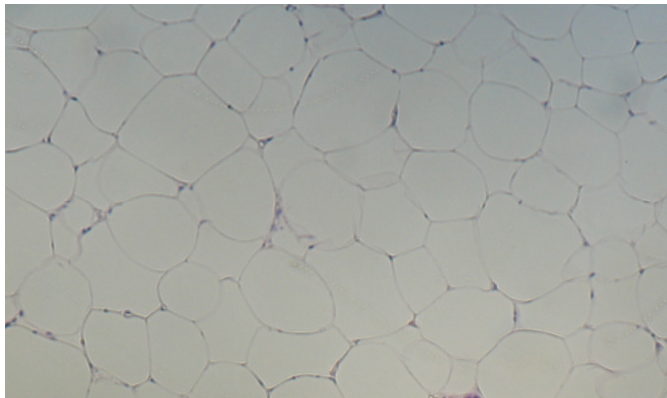

aP2-MSTN

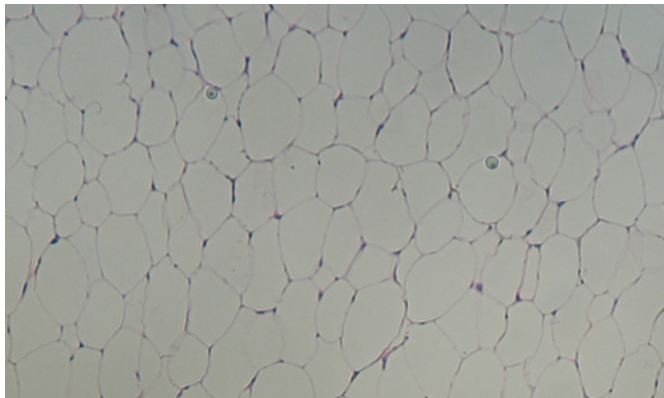

Supplement: pnas_0607501103_1.pdf [file pnas_0607501103_1.pdf]
